# Supplementary material
Source: PubMed Central journal article supplement (PMC4674359)
Supplement: NIHMS728210-supplement-1.pdf [file NIHMS728210-supplement-1.pdf]

**Table S1. RNAi gene enrichment (RIGER) analysis of the primary screen.**

The number of reads per shRNA was determined by Illumina sequencing and normalized to the total number of reads per sample. The data were then log<sub>2</sub> transformed. RIGER analysis was performed in Gene-E (<http://www.broadinstitute.org/cancer/software/GENE-E/>) as previously described [14].

| Gene      | # Hairpins | NES     | Gene rank | p-value |
|-----------|------------|---------|-----------|---------|
| MET       | 30         | 0.00082 | 1         | 0.0001  |
| MLL       | 5          | 0.00089 | 2         | 0.0001  |
| PTPN11    | 5          | 0.00099 | 3         | 0.0001  |
| CPA4      | 5          | 0.0062  | 4         | 0.0001  |
| CSTF3     | 5          | 0.0064  | 5         | 0.0001  |
| BCL2L12   | 5          | 0.0074  | 6         | 0.0001  |
| CACNG5    | 5          | 0.0076  | 7         | 0.0001  |
| SHOC2     | 10         | 0.0085  | 8         | 0.0004  |
| RAF1      | 10         | 0.01    | 9         | 0.0004  |
| CPN1      | 5          | 0.012   | 10        | 0.0003  |
| VIP       | 5          | 0.013   | 11        | 0.0007  |
| SORD      | 5          | 0.014   | 12        | 0.0008  |
| ADAMTS12  | 5          | 0.014   | 13        | 0.0008  |
| PPARA     | 5          | 0.015   | 14        | 0.001   |
| ZFAND1    | 5          | 0.015   | 15        | 0.001   |
| DLGAP5    | 5          | 0.016   | 16        | 0.0011  |
| SIRT5     | 5          | 0.016   | 17        | 0.0011  |
| CSAG2     | 3          | 0.017   | 18        | 0.0004  |
| BAP1      | 5          | 0.018   | 19        | 0.0012  |
| XCL2      | 5          | 0.018   | 20        | 0.0012  |
| FAM65C    | 5          | 0.019   | 21        | 0.0012  |
| ITK       | 9          | 0.019   | 22        | 0.0017  |
| LOC139542 | 5          | 0.019   | 23        | 0.0012  |
| FBXO11    | 5          | 0.02    | 24        | 0.0012  |
| SLC39A9   | 5          | 0.02    | 25        | 0.0013  |
| USP47     | 5          | 0.02    | 26        | 0.0013  |
| PNMA5     | 5          | 0.021   | 27        | 0.0013  |
| ZNF141    | 5          | 0.021   | 28        | 0.0013  |
| THNSL2    | 10         | 0.021   | 29        | 0.0022  |
| PIK3R5    | 10         | 0.021   | 30        | 0.0022  |
| PXMP2     | 4          | 0.022   | 31        | 0.0014  |
| ARID1B    | 4          | 0.023   | 32        | 0.0014  |
| C13orf15  | 10         | 0.023   | 33        | 0.0025  |
| SLC38A10  | 5          | 0.024   | 34        | 0.0018  |
| ZNF641    | 5          | 0.024   | 35        | 0.0019  |
| CPD       | 5          | 0.025   | 36        | 0.0019  |
| CCDC58    | 5          | 0.025   | 37        | 0.0019  |
| FBXL2     | 5          | 0.025   | 38        | 0.002   |
| KCNH6     | 5          | 0.026   | 39        | 0.0021  |
| MCHR1     | 5          | 0.026   | 40        | 0.0021  |
| CD59      | 5          | 0.026   | 41        | 0.0021  |
| GFRA2     | 5          | 0.026   | 42        | 0.0022  |
| GTF2H1    | 5          | 0.027   | 43        | 0.0023  |
| POLK      | 5          | 0.027   | 44        | 0.0023  |

| Gene      | # Hairpins | NES   | Gene rank | p-value |
|-----------|------------|-------|-----------|---------|
| EDF1      | 5          | 0.027 | 45        | 0.0023  |
| TOP1      | 5          | 0.028 | 46        | 0.0025  |
| CRKL      | 5          | 0.028 | 47        | 0.0025  |
| ODAM      | 10         | 0.029 | 48        | 0.0039  |
| AASDHPPT  | 5          | 0.029 | 49        | 0.0025  |
| SOX17     | 3          | 0.029 | 50        | 0.001   |
| GPR6      | 3          | 0.029 | 51        | 0.001   |
| PDZK1IP1  | 5          | 0.029 | 52        | 0.0025  |
| HDAC3     | 10         | 0.029 | 53        | 0.004   |
| RNF13     | 5          | 0.029 | 54        | 0.0025  |
| RAC1      | 5          | 0.03  | 55        | 0.0026  |
| DDX3X     | 5          | 0.031 | 56        | 0.0028  |
| NOX1      | 5          | 0.031 | 57        | 0.0028  |
| LOC402434 | 5          | 0.031 | 58        | 0.0028  |
| ATP5S     | 5          | 0.031 | 59        | 0.0028  |
| GPR44     | 5          | 0.032 | 60        | 0.0029  |
| MPPED1    | 5          | 0.032 | 61        | 0.0029  |
| IFITM2    | 4          | 0.032 | 62        | 0.0033  |
| SPA17     | 4          | 0.032 | 63        | 0.0033  |
| GINS2     | 4          | 0.033 | 64        | 0.0034  |
| ATG2B     | 4          | 0.033 | 65        | 0.0034  |
| INPP5A    | 5          | 0.034 | 66        | 0.0035  |
| COL8A2    | 5          | 0.034 | 67        | 0.0035  |
| C20orf70  | 4          | 0.034 | 68        | 0.0037  |
| GFP       | 24         | 0.034 | 69        | 0.0059  |
| LOC440945 | 5          | 0.034 | 70        | 0.0035  |
| SYBL1     | 5          | 0.034 | 71        | 0.0035  |
| TMEM45A   | 5          | 0.035 | 72        | 0.0037  |
| CD58      | 5          | 0.035 | 73        | 0.0038  |
| AFMID     | 5          | 0.035 | 74        | 0.0038  |
| PPFIA1    | 5          | 0.035 | 75        | 0.0038  |
| ASB6      | 9          | 0.035 | 76        | 0.0059  |
| PF4V1     | 5          | 0.035 | 77        | 0.0038  |
| SNAPC3    | 5          | 0.036 | 78        | 0.0039  |
| WNT4      | 4          | 0.036 | 79        | 0.0039  |
| SNAP23    | 10         | 0.036 | 80        | 0.0065  |
| PLAA      | 4          | 0.036 | 81        | 0.0039  |
| IFT172    | 5          | 0.036 | 82        | 0.0043  |
| SPANXN1   | 5          | 0.037 | 83        | 0.0043  |
| WNT11     | 3          | 0.037 | 84        | 0.0021  |
| C10orf137 | 5          | 0.037 | 85        | 0.0043  |
| ELL       | 5          | 0.037 | 86        | 0.0043  |
| PRG2      | 10         | 0.037 | 87        | 0.0071  |
| GDPD1     | 5          | 0.039 | 88        | 0.0048  |

| Gene     | # Hairpins | NES   | Gene rank | p-value |
|----------|------------|-------|-----------|---------|
| CEACAM7  | 5          | 0.039 | 89        | 0.0049  |
| OPCML    | 5          | 0.039 | 90        | 0.0049  |
| GNG7     | 8          | 0.04  | 91        | 0.0062  |
| PIK3C2G  | 9          | 0.04  | 92        | 0.0083  |
| MXRA8    | 5          | 0.04  | 93        | 0.0051  |
| CCDC82   | 5          | 0.041 | 94        | 0.0051  |
| OPTC     | 10         | 0.041 | 95        | 0.0082  |
| BTNL8    | 5          | 0.041 | 96        | 0.0053  |
| GTSE1    | 5          | 0.041 | 97        | 0.0054  |
| ANTXR1   | 5          | 0.042 | 98        | 0.0054  |
| FUBP1    | 5          | 0.042 | 99        | 0.0057  |
| MARK3    | 9          | 0.042 | 100       | 0.0087  |
| SQSTM1   | 5          | 0.042 | 101       | 0.0058  |
| EEF1A1   | 5          | 0.043 | 102       | 0.0059  |
| CST5     | 5          | 0.043 | 103       | 0.0059  |
| TMEM31   | 5          | 0.043 | 104       | 0.006   |
| CCNT1    | 5          | 0.043 | 105       | 0.0061  |
| CD2      | 5          | 0.044 | 106       | 0.0061  |
| HLA-DPB1 | 5          | 0.044 | 107       | 0.0061  |
| ITGAV    | 5          | 0.044 | 108       | 0.0061  |
| TSPAN4   | 5          | 0.044 | 109       | 0.0062  |
| GMPPA    | 9          | 0.044 | 110       | 0.0098  |
| C12orf44 | 5          | 0.044 | 111       | 0.0064  |
| WBSCR23  | 5          | 0.045 | 112       | 0.0064  |
| CBR3     | 5          | 0.045 | 113       | 0.0064  |
| SIVA1    | 4          | 0.045 | 114       | 0.0065  |
| tAKR     | 5          | 0.045 | 115       | 0.0065  |
| KHK      | 8          | 0.045 | 116       | 0.0083  |
| RBMS3    | 5          | 0.045 | 117       | 0.0065  |
| TRA2A    | 5          | 0.045 | 118       | 0.0065  |
| ZC3H13   | 5          | 0.046 | 119       | 0.0065  |
| CXYorf3  | 5          | 0.046 | 120       | 0.0065  |
| WIRE     | 5          | 0.046 | 121       | 0.0066  |
| SAP130   | 5          | 0.046 | 122       | 0.0066  |
| STRADA   | 4          | 0.046 | 123       | 0.0069  |
| MOBK2L2C | 5          | 0.046 | 124       | 0.0067  |
| SLC17A2  | 5          | 0.047 | 125       | 0.0067  |
| MAP2K2   | 10         | 0.047 | 126       | 0.01    |
| RALGPS1  | 5          | 0.047 | 127       | 0.0067  |
| PLK2     | 10         | 0.047 | 128       | 0.011   |
| TTPAL    | 4          | 0.047 | 129       | 0.0072  |
| CYP4B1   | 5          | 0.048 | 130       | 0.0069  |
| ATG4C    | 5          | 0.048 | 131       | 0.0072  |
| BRAP     | 5          | 0.048 | 132       | 0.0072  |

| Gene      | # Hairpins | NES   | Gene rank | p-value |
|-----------|------------|-------|-----------|---------|
| BTNL2     | 5          | 0.048 | 133       | 0.0072  |
| EFNB2     | 5          | 0.048 | 134       | 0.0072  |
| SFTPA2B   | 7          | 0.049 | 135       | 0.0095  |
| RIOK1     | 9          | 0.049 | 136       | 0.012   |
| TLX2      | 5          | 0.049 | 137       | 0.0073  |
| NCKAP1    | 5          | 0.049 | 138       | 0.0074  |
| DMRT3     | 4          | 0.049 | 139       | 0.0074  |
| C11orf16  | 5          | 0.05  | 140       | 0.0077  |
| MCRS1     | 10         | 0.05  | 141       | 0.011   |
| BMP6      | 5          | 0.05  | 142       | 0.0079  |
| SLC35D1   | 5          | 0.05  | 143       | 0.008   |
| OR2L13    | 5          | 0.05  | 144       | 0.008   |
| C19orf10  | 5          | 0.05  | 145       | 0.008   |
| RAI14     | 5          | 0.051 | 146       | 0.008   |
| ADAMTS5   | 5          | 0.051 | 147       | 0.0081  |
| CSTF2T    | 10         | 0.051 | 148       | 0.012   |
| DNAJB12   | 5          | 0.051 | 149       | 0.0082  |
| IGFBP1    | 7          | 0.051 | 150       | 0.011   |
| PRC1      | 10         | 0.051 | 151       | 0.012   |
| C10orf116 | 4          | 0.052 | 152       | 0.0082  |
| LOC163223 | 5          | 0.052 | 153       | 0.0085  |
| PRIMA1    | 10         | 0.052 | 154       | 0.012   |
| ARHGAP29  | 5          | 0.053 | 155       | 0.0086  |
| ENTPD3    | 5          | 0.053 | 156       | 0.0086  |
| LTA       | 5          | 0.053 | 157       | 0.0086  |
| CLCN7     | 5          | 0.053 | 158       | 0.0086  |
| PDK2      | 9          | 0.053 | 159       | 0.014   |
| PDE2A     | 5          | 0.053 | 160       | 0.0086  |
| RAB24     | 5          | 0.053 | 161       | 0.0086  |
| LRRTM4    | 5          | 0.053 | 162       | 0.0086  |
| ENG       | 5          | 0.054 | 163       | 0.0086  |
| SEC63D1   | 10         | 0.054 | 164       | 0.014   |
| PTPN6     | 5          | 0.054 | 165       | 0.0088  |
| FLJ35834  | 4          | 0.054 | 166       | 0.0092  |
| CRYBA1    | 5          | 0.054 | 167       | 0.0089  |
| FAM116A   | 5          | 0.055 | 168       | 0.0089  |
| LIN7B     | 4          | 0.055 | 169       | 0.0092  |
| TJP2      | 5          | 0.055 | 170       | 0.0089  |
| POLRMT    | 5          | 0.055 | 171       | 0.0089  |
| ZNF431    | 5          | 0.055 | 172       | 0.0089  |
| TMEM219   | 9          | 0.055 | 173       | 0.015   |
| SS18      | 5          | 0.056 | 174       | 0.0093  |
| SSBP3     | 5          | 0.056 | 175       | 0.0093  |
| DDX21     | 5          | 0.056 | 176       | 0.0093  |

| Gene      | # Hairpins | NES   | Gene rank | p-value |
|-----------|------------|-------|-----------|---------|
| TGM1      | 5          | 0.056 | 177       | 0.0093  |
| SFRS11    | 5          | 0.057 | 178       | 0.0093  |
| RTDR1     | 5          | 0.057 | 179       | 0.0094  |
| PIGX      | 5          | 0.057 | 180       | 0.0094  |
| TBR1      | 5          | 0.057 | 181       | 0.0094  |
| KBTBD2    | 4          | 0.057 | 182       | 0.01    |
| GNB2      | 5          | 0.058 | 183       | 0.0097  |
| H2AFJ     | 5          | 0.058 | 184       | 0.0097  |
| C21orf81  | 5          | 0.058 | 185       | 0.0097  |
| KIAA0247  | 5          | 0.058 | 186       | 0.0099  |
| C6orf227  | 10         | 0.058 | 187       | 0.016   |
| LOC138932 | 5          | 0.059 | 188       | 0.01    |
| LUZP1     | 9          | 0.059 | 189       | 0.016   |
| NDRG4     | 9          | 0.059 | 190       | 0.016   |
| CLUL1     | 10         | 0.06  | 191       | 0.016   |
| KIAA0101  | 5          | 0.06  | 192       | 0.011   |
| RGN       | 4          | 0.061 | 193       | 0.012   |
| DAZ4      | 9          | 0.061 | 194       | 0.018   |
| SLC2A11   | 4          | 0.061 | 195       | 0.012   |
| PPCDC     | 5          | 0.062 | 196       | 0.011   |
| ZC3H3     | 5          | 0.062 | 197       | 0.011   |
| NRBP2     | 9          | 0.062 | 198       | 0.018   |
| NARS      | 5          | 0.062 | 199       | 0.012   |
| ADAMTS19  | 5          | 0.062 | 200       | 0.012   |
| IGSF10    | 5          | 0.062 | 201       | 0.012   |
| BRD1      | 5          | 0.062 | 202       | 0.012   |
| TIMM10    | 9          | 0.063 | 203       | 0.019   |
| OTOP2     | 5          | 0.063 | 204       | 0.012   |
| FNTA      | 5          | 0.063 | 205       | 0.012   |
| ZFX       | 5          | 0.063 | 206       | 0.012   |
| PPP3CB    | 5          | 0.063 | 207       | 0.012   |
| C6orf170  | 5          | 0.063 | 208       | 0.012   |
| LRRC23    | 4          | 0.063 | 209       | 0.012   |
| OR8U1     | 5          | 0.063 | 210       | 0.012   |
| FRMD5     | 5          | 0.063 | 211       | 0.012   |
| MS4A7     | 3          | 0.064 | 212       | 0.0068  |
| NDFIP2    | 5          | 0.064 | 213       | 0.012   |
| SHPK      | 5          | 0.064 | 214       | 0.012   |
| ECM1      | 5          | 0.064 | 215       | 0.012   |
| BIRC1     | 5          | 0.064 | 216       | 0.012   |
| PRKDC     | 10         | 0.064 | 217       | 0.018   |
| MYO1C     | 5          | 0.065 | 218       | 0.012   |
| ERBB3     | 16         | 0.065 | 219       | 0.021   |
| MS4A6E    | 5          | 0.065 | 220       | 0.012   |

| Gene     | # Hairpins | NES   | Gene rank | p-value |
|----------|------------|-------|-----------|---------|
| IL17C    | 5          | 0.065 | 221       | 0.013   |
| FLJ35220 | 5          | 0.065 | 222       | 0.013   |
| GSPT1    | 5          | 0.065 | 223       | 0.013   |
| OSGEP    | 5          | 0.065 | 224       | 0.013   |
| NPM2     | 10         | 0.066 | 225       | 0.019   |
| LEPREL2  | 5          | 0.066 | 226       | 0.013   |
| MAD2L1BP | 5          | 0.066 | 227       | 0.013   |
| ABCB1    | 5          | 0.066 | 228       | 0.013   |
| DBN1     | 5          | 0.066 | 229       | 0.013   |
| MX2      | 5          | 0.067 | 230       | 0.013   |
| ZNF100   | 5          | 0.067 | 231       | 0.013   |
| C2orf85  | 4          | 0.067 | 232       | 0.013   |
| PATZ1    | 5          | 0.067 | 233       | 0.014   |
| RPS6KA1  | 14         | 0.067 | 234       | 0.022   |
| RAB28    | 5          | 0.068 | 235       | 0.014   |
| SSU72    | 5          | 0.068 | 236       | 0.014   |
| DSCC1    | 10         | 0.068 | 237       | 0.02    |
| FXN      | 5          | 0.068 | 238       | 0.014   |
| GAB1     | 5          | 0.068 | 239       | 0.014   |
| UGT2B17  | 5          | 0.068 | 240       | 0.014   |
| TPM3     | 5          | 0.068 | 241       | 0.014   |
| SLC39A14 | 5          | 0.068 | 242       | 0.014   |
| MYF5     | 5          | 0.068 | 243       | 0.014   |
| KLRC1    | 5          | 0.068 | 244       | 0.014   |
| RDH8     | 5          | 0.068 | 245       | 0.014   |
| HAPLN1   | 5          | 0.069 | 246       | 0.014   |
| PPIA     | 4          | 0.069 | 247       | 0.014   |
| SENP5    | 5          | 0.069 | 248       | 0.014   |
| HMX3     | 5          | 0.069 | 249       | 0.014   |
| CXorf58  | 14         | 0.069 | 250       | 0.023   |
| OR511    | 5          | 0.069 | 251       | 0.014   |
| ZNF507   | 5          | 0.069 | 252       | 0.014   |
| MDFI     | 5          | 0.069 | 253       | 0.014   |
| SLC30A5  | 5          | 0.069 | 254       | 0.014   |
| CSNK2B   | 10         | 0.069 | 255       | 0.021   |
| PELI1    | 4          | 0.069 | 256       | 0.014   |
| ACR      | 5          | 0.07  | 257       | 0.014   |
| AURKA    | 9          | 0.07  | 258       | 0.022   |
| PAPOLA   | 5          | 0.07  | 259       | 0.014   |
| ASXL1    | 5          | 0.07  | 260       | 0.014   |
| DNAJC21  | 5          | 0.07  | 261       | 0.014   |
| BTBD11   | 10         | 0.07  | 262       | 0.022   |
| WEE1     | 10         | 0.071 | 263       | 0.022   |
| EDG5     | 4          | 0.071 | 264       | 0.015   |

| Gene     | # Hairpins | NES   | Gene rank | p-value |
|----------|------------|-------|-----------|---------|
| CPA3     | 5          | 0.071 | 265       | 0.014   |
| SNX9     | 5          | 0.071 | 266       | 0.014   |
| CSRP1    | 5          | 0.071 | 267       | 0.014   |
| LACTB    | 5          | 0.071 | 268       | 0.014   |
| ALS2     | 5          | 0.071 | 269       | 0.015   |
| ANGPTL7  | 5          | 0.072 | 270       | 0.015   |
| C6orf35  | 5          | 0.072 | 271       | 0.015   |
| MARVELD2 | 5          | 0.072 | 272       | 0.015   |
| SIRPG    | 5          | 0.072 | 273       | 0.015   |
| RWDD3    | 5          | 0.072 | 274       | 0.015   |
| SFTPC    | 5          | 0.072 | 275       | 0.015   |
| LIG3     | 5          | 0.073 | 276       | 0.015   |
| ERGIC2   | 5          | 0.073 | 277       | 0.015   |
| GPR113   | 5          | 0.073 | 278       | 0.015   |
| MTPN     | 4          | 0.073 | 279       | 0.015   |
| UGT2B10  | 5          | 0.073 | 280       | 0.015   |
| GAL3ST2  | 5          | 0.073 | 281       | 0.015   |
| KIF3B    | 5          | 0.074 | 282       | 0.015   |
| GBE1     | 5          | 0.074 | 283       | 0.015   |
| ILKAP    | 5          | 0.074 | 284       | 0.015   |
| ZFYVE1   | 9          | 0.074 | 285       | 0.024   |
| TP53I3   | 5          | 0.074 | 286       | 0.016   |
| NTRK2    | 10         | 0.074 | 287       | 0.024   |
| TMOD1    | 5          | 0.074 | 288       | 0.016   |
| HOXA11   | 5          | 0.074 | 289       | 0.016   |
| FGD4     | 5          | 0.075 | 290       | 0.016   |
| PLA2G7   | 5          | 0.075 | 291       | 0.016   |
| PVALB    | 4          | 0.075 | 292       | 0.016   |
| FBXO6    | 5          | 0.076 | 293       | 0.017   |
| FGF5     | 5          | 0.076 | 294       | 0.017   |
| ZNRF2    | 5          | 0.076 | 295       | 0.017   |
| ZNF587   | 5          | 0.076 | 296       | 0.017   |
| TSPAN8   | 5          | 0.076 | 297       | 0.017   |
| SPRN     | 9          | 0.076 | 298       | 0.026   |
| SMS      | 5          | 0.076 | 299       | 0.017   |
| CCDC55   | 4          | 0.076 | 300       | 0.017   |
| NFAM1    | 5          | 0.076 | 301       | 0.017   |
| NSDHL    | 5          | 0.076 | 302       | 0.017   |
| CLEC4C   | 5          | 0.076 | 303       | 0.017   |
| GPX8     | 5          | 0.077 | 304       | 0.017   |
| ADRBK2   | 10         | 0.077 | 305       | 0.026   |
| GINS1    | 9          | 0.077 | 306       | 0.026   |
| CTSZ     | 4          | 0.077 | 307       | 0.017   |
| HSPA1B   | 5          | 0.077 | 308       | 0.018   |



| Gene      | # Hairpins | NES   | Gene rank | p-value |
|-----------|------------|-------|-----------|---------|
| METTL6    | 5          | 0.077 | 309       | 0.018   |
| COL5A1    | 5          | 0.077 | 310       | 0.018   |
| LOC402280 | 5          | 0.078 | 311       | 0.018   |
| FBXO4     | 5          | 0.078 | 312       | 0.018   |
| FLJ39501  | 5          | 0.078 | 313       | 0.018   |
| IGSF1     | 5          | 0.078 | 314       | 0.018   |
| OVGP1     | 4          | 0.079 | 315       | 0.017   |
| LYSMD4    | 5          | 0.079 | 316       | 0.018   |
| H2-ALPHA  | 4          | 0.079 | 317       | 0.017   |
| BAAT      | 5          | 0.079 | 318       | 0.018   |
| PDE1B     | 5          | 0.079 | 319       | 0.018   |
| DLK1      | 5          | 0.079 | 320       | 0.018   |
| MID1IP1   | 10         | 0.079 | 321       | 0.028   |
| FRMD7     | 5          | 0.079 | 322       | 0.018   |
| CA5B      | 10         | 0.079 | 323       | 0.028   |
| TFE3      | 5          | 0.079 | 324       | 0.018   |
| ZXDC      | 4          | 0.079 | 325       | 0.018   |
| CLTB      | 5          | 0.079 | 326       | 0.018   |
| NTSR2     | 5          | 0.08  | 327       | 0.019   |
| AZI1      | 5          | 0.08  | 328       | 0.019   |
| MGMT      | 5          | 0.08  | 329       | 0.019   |
| PLD1      | 5          | 0.08  | 330       | 0.019   |
| SEC14L2   | 5          | 0.08  | 331       | 0.019   |
| AQP5      | 4          | 0.08  | 332       | 0.018   |
| ZNF780B   | 4          | 0.08  | 333       | 0.018   |
| S100A7A   | 5          | 0.081 | 334       | 0.019   |
| GPR23     | 5          | 0.081 | 335       | 0.019   |
| TMEM60    | 5          | 0.081 | 336       | 0.019   |
| C11orf24  | 4          | 0.081 | 337       | 0.018   |
| PTTG1     | 5          | 0.081 | 338       | 0.019   |
| CPEB2     | 5          | 0.081 | 339       | 0.02    |
| GP1BA     | 5          | 0.082 | 340       | 0.02    |
| NPY5R     | 5          | 0.082 | 341       | 0.02    |
| DCTN1     | 5          | 0.082 | 342       | 0.02    |
| CMTM6     | 5          | 0.082 | 343       | 0.02    |
| CTCFL     | 5          | 0.082 | 344       | 0.02    |
| POLR3K    | 4          | 0.082 | 345       | 0.019   |
| RFXANK    | 5          | 0.083 | 346       | 0.02    |
| ANKLE1    | 10         | 0.083 | 347       | 0.031   |
| SFRS4     | 5          | 0.083 | 348       | 0.02    |
| PRDX4     | 5          | 0.083 | 349       | 0.02    |
| MURC      | 9          | 0.083 | 350       | 0.03    |
| DPY19L1P1 | 5          | 0.083 | 351       | 0.02    |
| UBR4      | 5          | 0.083 | 352       | 0.02    |

| Gene      | # Hairpins | NES   | Gene rank | p-value |
|-----------|------------|-------|-----------|---------|
| RRP12     | 5          | 0.083 | 353       | 0.02    |
| SETD7     | 5          | 0.083 | 354       | 0.02    |
| ADAM11    | 3          | 0.083 | 355       | 0.013   |
| RPL39     | 5          | 0.084 | 356       | 0.02    |
| LOC442428 | 5          | 0.084 | 357       | 0.02    |
| PDZD7     | 10         | 0.084 | 358       | 0.032   |
| SNF1LK    | 5          | 0.084 | 359       | 0.02    |
| PTHLH     | 5          | 0.084 | 360       | 0.02    |
| DKK3      | 5          | 0.084 | 361       | 0.02    |
| CLDN10    | 4          | 0.084 | 362       | 0.019   |
| GPR128    | 4          | 0.084 | 363       | 0.019   |
| SLC26A1   | 5          | 0.084 | 364       | 0.021   |
| ACCSL     | 5          | 0.084 | 365       | 0.021   |
| ETV1      | 5          | 0.084 | 366       | 0.021   |
| LY86      | 10         | 0.085 | 367       | 0.032   |
| GPR25     | 5          | 0.085 | 368       | 0.021   |
| RAG2      | 5          | 0.085 | 369       | 0.021   |
| BPY2      | 5          | 0.085 | 370       | 0.021   |
| SLAMF6    | 5          | 0.085 | 371       | 0.021   |
| PKIB      | 5          | 0.085 | 372       | 0.021   |
| ZMYND11   | 5          | 0.085 | 373       | 0.021   |
| LOC442313 | 5          | 0.086 | 374       | 0.021   |
| ARC       | 5          | 0.086 | 375       | 0.021   |
| SPIC      | 5          | 0.086 | 376       | 0.022   |
| SYT13     | 5          | 0.086 | 377       | 0.022   |
| SLC25A44  | 5          | 0.087 | 378       | 0.022   |
| GPR85     | 5          | 0.087 | 379       | 0.022   |
| PHKB      | 10         | 0.087 | 380       | 0.034   |
| KLKB1     | 5          | 0.087 | 381       | 0.022   |
| TNFAIP8L1 | 10         | 0.087 | 382       | 0.034   |
| HPCA      | 5          | 0.087 | 383       | 0.022   |
| MAT2B     | 5          | 0.087 | 384       | 0.022   |
| PGCP      | 5          | 0.088 | 385       | 0.022   |
| TMEM217   | 5          | 0.088 | 386       | 0.022   |
| TMEM14B   | 5          | 0.088 | 387       | 0.022   |
| HDGF      | 5          | 0.088 | 388       | 0.023   |
| PEX1      | 5          | 0.088 | 389       | 0.023   |
| PRDX2     | 5          | 0.089 | 390       | 0.023   |
| CCL8      | 5          | 0.089 | 391       | 0.023   |
| GRB2      | 5          | 0.089 | 392       | 0.023   |
| TMPRSS11B | 5          | 0.089 | 393       | 0.023   |
| C9orf139  | 10         | 0.09  | 394       | 0.035   |
| RANGRF    | 10         | 0.09  | 395       | 0.035   |
| TRIM34    | 5          | 0.09  | 396       | 0.023   |

| Gene      | # Hairpins | NES   | Gene rank | p-value |
|-----------|------------|-------|-----------|---------|
| ZNF37A    | 5          | 0.09  | 397       | 0.023   |
| GDF9      | 5          | 0.09  | 398       | 0.023   |
| NUDT14    | 4          | 0.09  | 399       | 0.021   |
| WBP1      | 5          | 0.091 | 400       | 0.024   |
| KRT34     | 5          | 0.091 | 401       | 0.024   |
| MAPRE3    | 2          | 0.091 | 402       | 0.0064  |
| SLAMF9    | 5          | 0.091 | 403       | 0.024   |
| NUP155    | 5          | 0.091 | 404       | 0.024   |
| MLLT1     | 5          | 0.091 | 405       | 0.024   |
| ESCO2     | 5          | 0.091 | 406       | 0.024   |
| ETF1      | 10         | 0.091 | 407       | 0.036   |
| C1orf87   | 5          | 0.091 | 408       | 0.024   |
| DRD2      | 5          | 0.091 | 409       | 0.024   |
| ADAL      | 5          | 0.091 | 410       | 0.024   |
| DDX25     | 9          | 0.092 | 411       | 0.035   |
| C5orf4    | 5          | 0.092 | 412       | 0.024   |
| C6orf127  | 5          | 0.092 | 413       | 0.024   |
| MAGEA2    | 3          | 0.092 | 414       | 0.016   |
| RASSF2    | 4          | 0.092 | 415       | 0.021   |
| PSTK      | 5          | 0.092 | 416       | 0.024   |
| TLL2      | 5          | 0.092 | 417       | 0.024   |
| HKDC1     | 5          | 0.092 | 418       | 0.024   |
| ISOC1     | 10         | 0.092 | 419       | 0.036   |
| ST14      | 5          | 0.093 | 420       | 0.024   |
| PSMF1     | 5          | 0.093 | 421       | 0.025   |
| FCGR2B    | 5          | 0.093 | 422       | 0.025   |
| IMP4      | 5          | 0.093 | 423       | 0.025   |
| PLK4      | 19         | 0.093 | 424       | 0.046   |
| ZFYVE21   | 5          | 0.093 | 425       | 0.025   |
| KAAG1     | 5          | 0.093 | 426       | 0.025   |
| SORCS3    | 5          | 0.093 | 427       | 0.025   |
| CEP290    | 5          | 0.093 | 428       | 0.025   |
| FLJ20273  | 5          | 0.094 | 429       | 0.025   |
| CTU2      | 9          | 0.094 | 430       | 0.036   |
| HLA-DRB4  | 5          | 0.094 | 431       | 0.025   |
| CDH24     | 5          | 0.094 | 432       | 0.025   |
| ZNF140    | 5          | 0.094 | 433       | 0.025   |
| P2RY14    | 3          | 0.094 | 434       | 0.017   |
| SMARCD3   | 5          | 0.094 | 435       | 0.025   |
| PHF16     | 5          | 0.094 | 436       | 0.025   |
| SLC35A5   | 5          | 0.094 | 437       | 0.025   |
| ZC3H7A    | 9          | 0.095 | 438       | 0.037   |
| LOC441708 | 4          | 0.095 | 439       | 0.023   |
| LOC345829 | 5          | 0.095 | 440       | 0.025   |

| Gene      | # Hairpins | NES   | Gene rank | p-value |
|-----------|------------|-------|-----------|---------|
| COX5B     | 5          | 0.095 | 441       | 0.025   |
| ACSL6     | 5          | 0.095 | 442       | 0.025   |
| MAGEA4    | 10         | 0.095 | 443       | 0.039   |
| HOXB3     | 5          | 0.095 | 444       | 0.025   |
| GPR27     | 4          | 0.095 | 445       | 0.023   |
| MAP3K7IP2 | 5          | 0.095 | 446       | 0.025   |
| CCDC136   | 5          | 0.095 | 447       | 0.025   |
| FAM192A   | 5          | 0.095 | 448       | 0.025   |
| OR5T1     | 5          | 0.095 | 449       | 0.025   |
| ABCC12    | 5          | 0.095 | 450       | 0.025   |
| BAT4      | 10         | 0.095 | 451       | 0.04    |
| PHC2      | 10         | 0.096 | 452       | 0.04    |
| DHRS4L2   | 5          | 0.096 | 453       | 0.026   |
| PYGO2     | 5          | 0.096 | 454       | 0.026   |
| USP48     | 5          | 0.096 | 455       | 0.026   |
| EPDR1     | 3          | 0.096 | 456       | 0.017   |
| MPN2      | 4          | 0.096 | 457       | 0.023   |
| HAGHL     | 5          | 0.096 | 458       | 0.026   |
| GTPBP4    | 5          | 0.096 | 459       | 0.026   |
| PPIL6     | 5          | 0.097 | 460       | 0.026   |
| C4orf34   | 5          | 0.097 | 461       | 0.026   |
| C5orf35   | 5          | 0.097 | 462       | 0.026   |
| GLE1      | 5          | 0.097 | 463       | 0.026   |
| GTF3C6    | 5          | 0.097 | 464       | 0.026   |
| BRE       | 5          | 0.097 | 465       | 0.026   |
| SPINK2    | 4          | 0.097 | 466       | 0.024   |
| RGS18     | 5          | 0.097 | 467       | 0.026   |
| METTL9    | 5          | 0.097 | 468       | 0.026   |
| ATP2C1    | 5          | 0.098 | 469       | 0.026   |
| RNASE8    | 4          | 0.098 | 470       | 0.024   |
| SMARCD2   | 5          | 0.098 | 471       | 0.026   |
| C9orf103  | 5          | 0.098 | 472       | 0.026   |
| SLC31A1   | 5          | 0.098 | 473       | 0.026   |
| C5orf33   | 5          | 0.098 | 474       | 0.026   |
| TRIM2     | 5          | 0.098 | 475       | 0.026   |
| DLST      | 4          | 0.098 | 476       | 0.024   |
| SLC15A3   | 5          | 0.098 | 477       | 0.026   |
| MGC4172   | 5          | 0.098 | 478       | 0.026   |
| CNTFR     | 5          | 0.098 | 479       | 0.026   |
| UGT8      | 5          | 0.099 | 480       | 0.026   |
| PLAU      | 9          | 0.099 | 481       | 0.04    |
| TMED8     | 5          | 0.099 | 482       | 0.026   |
| CDK4      | 13         | 0.099 | 483       | 0.048   |
| AREG      | 4          | 0.099 | 484       | 0.025   |

| Gene      | # Hairpins | NES   | Gene rank | p-value |
|-----------|------------|-------|-----------|---------|
| EPB41L3   | 5          | 0.099 | 485       | 0.026   |
| KIAA1639  | 3          | 0.099 | 486       | 0.019   |
| ELP4      | 5          | 0.099 | 487       | 0.026   |
| KIAA0556  | 5          | 0.099 | 488       | 0.026   |
| GPR142    | 5          | 0.099 | 489       | 0.026   |
| ALDH8A1   | 4          | 0.099 | 490       | 0.025   |
| TFAM      | 5          | 0.1   | 491       | 0.027   |
| RECK      | 5          | 0.1   | 492       | 0.027   |
| PSMD8     | 5          | 0.1   | 493       | 0.027   |
| REG1A     | 5          | 0.1   | 494       | 0.027   |
| KCNE3     | 5          | 0.1   | 495       | 0.027   |
| CDR2L     | 10         | 0.1   | 496       | 0.043   |
| LOC390377 | 4          | 0.1   | 497       | 0.026   |
| FCGRT     | 5          | 0.1   | 498       | 0.027   |
| IP6K2     | 4          | 0.1   | 499       | 0.026   |
